# Supplementary material for: Novel 2D carbon material T-graphene supported 3d transition metal single atoms as efficient oxygen reduction catalysts
Source: Royal Society of Chemistry journal article supplement (doi:10.1039/d3nr03507g), 2023-01-01
Supplement: d3nr03507g1.pdf [file d3nr03507g1.pdf]

## Supporting Information

### A Novel 2D Carbon material T-graphene supported 3d Transition Metals as Efficient Oxygen Reduction Catalysts

Run Jiang, Zelong Qiao, Haoxiang Xu, Dapeng Cao\*

State Key Laboratory of Organic-Inorganic Composites, Beijing University of Chemical  
Technology, Beijing 100029, People's Republic of China

\*Email: [caodp@mail.buct.edu.cn](mailto:caodp@mail.buct.edu.cn)

#### 1 Computation Details

##### 1.1 DFT computational methods

All calculations were based on the first principles under the framework of spin-polarized density functional theory (DFT), using the Vienna ab initio simulation package (VASP) code<sup>1, 2</sup>, and using the Perdew-Burke-Ernzerhof (PBE) functional<sup>3-6</sup> to model the exchange correlation energy under the generalized gradient approximation (GGA). The projection enhanced wave (PAW) pseudopotential<sup>7</sup> was used to describe ionic nuclei. The plane-wave cut-off energy of 500 eV was adopted. The convergence threshold of iteration in self-consistent field (SCF) was set to  $10^{-5}$  eV per atom for energy and  $0.02 \text{ eV } \text{Å}^{-1}$  for the force. The Gauss smearing of 0.05 eV was used for orbital occupation. Moreover, to solve the non-localization problem that the PBE exchange correlation function cannot accurately describe the electronic interaction of transition metal atoms, the DFT+U method<sup>8-12</sup> was applied through the rotation invariant method, and the value of U–J of the 3d-orbitals of 3d transition metals are set as shown in **Table S1**. A  $\Gamma$ -centered Monkhorst-Pack  $3 \times 3 \times 1$  k-point grid was used to sample the Brillouin zone for structural optimization. A large

vacuum plate of 20 Å in the z direction was insert for surface isolation to prevent the interaction between two adjacent surfaces. DFT-D3 method with Becke-Jonson damping<sup>13</sup>,<sup>14</sup> was used for vdW corrections. VASP-sol package<sup>15</sup> was used to simulate the solution environment, where the dielectric constant was set to 80. The Lobster software<sup>16</sup> was used to perform the COHP analysis<sup>17</sup>, and obtain the bonding and anti-bonding information. VASP-kit code<sup>18</sup> was used to extract electronic density of states.

## 1.2 ORR reaction free energies

The ORR pathway on SACs were calculated in detail according to electrochemical framework developed by Nørskov and his co-workers<sup>19, 20</sup>. For each elementary step, the Gibbs reaction free energy  $\Delta G$  is defined as the difference between free energies of the initial and final states and is given by the expression:

$$\Delta G = \Delta E + \Delta ZPE - T\Delta S + \Delta G_U + \Delta G_{pH} \quad (1)$$

where  $\Delta G_U$  is the free energy change caused by the applied potential  $U$  ( $\Delta G_U = -neU$ ), and  $U$  is the applied potential vs. RHE electrode,  $e$  is the transferred elementary charge and  $n$  is the transferred proton-electron pairs.  $\Delta G_{pH}$  is the corrected value of  $H^+$  free energy ( $\Delta G_{pH} = -k_B T \ln[H^+] = pH \times k_B T \ln 10$ , where  $k_B$  is the Boltzmann constant and  $T$  is the temperature). According to Nernst equation,  $U_{RHE}^0 = 1.23$  V.

Therefore, the reaction free energy of  $\Delta G_1$ ,  $\Delta G_2$ ,  $\Delta G_3$ ,  $\Delta G_4$  for ORR can be calculated using the following equations:

$$\Delta G_1 = \Delta G_{*OOH} - 4.92 + \Delta G_U + \Delta G_{pH} \quad (2)$$

$$\Delta G_2 = \Delta G_{*O} - \Delta G_{*OOH} + \Delta G_U + \Delta G_{pH} \quad (3)$$

$$\Delta G_3 = \Delta G_{*OH} - \Delta G_{*O} + \Delta G_U + \Delta G_{pH} \quad (4)$$

$$\Delta G_4 = -\Delta G_{*OH} + \Delta G_U + \Delta G_{pH} \quad (5)$$

Since it is difficult to obtain the exact free energy of O, OH and OOH radicals in the electrolyte solution, the adsorption free energy  $\Delta G_{*O}$ ,  $\Delta G_{*OH}$ , and  $\Delta G_{*OOH}$  are relative to the free energy of stoichiometrically appropriate amounts of H<sub>2</sub>O and H<sub>2</sub>, defined as follows:

$$\Delta G_{*O} = E_{*O} + E_{H_2} - E_{H_2O} - E^* + \Delta ZPE - T\Delta S \quad (6)$$

$$\Delta G_{*OH} = E_{*OH} + 0.5 \times E_{H_2} - E_{H_2O} - E^* + \Delta ZPE - T\Delta S \quad (7)$$

$$\Delta G_{*OOH} = E_{*OOH} + 1.5 \times E_{H_2} - 2 \times E_{H_2O} - E^* + \Delta ZPE - T\Delta S \quad (8)$$

where  $\Delta E$  is the reaction energy of reactants and product adsorbed on the catalyst surface;  $\Delta ZPE$  and  $\Delta S$  are the zero-point energy and entropy correction.<sup>1</sup> The values used for zero-point energy corrections of intermediates are listed in **Table S2**. Energy values for H<sub>2</sub>O, O<sub>2</sub> and H<sub>2</sub> are listed in **Table S3**.

### 1.3 bond order

The bond order is defined as half the difference between the number of bonding electrons and the number of anti-bonding electrons<sup>21</sup>:

$$\text{bond order} = (N_{\text{bonding}} - N_{\text{anti-bonding}}) / 2 \quad (9)$$

where  $N_{\text{bonding}}$  and  $N_{\text{anti-bonding}}$  represent the electrons number of bonding and anti-bonding, respectively. The higher the bond order, the stronger the orbital interaction between cations and oxygenated intermediates.

## 2 Supplementary Figures

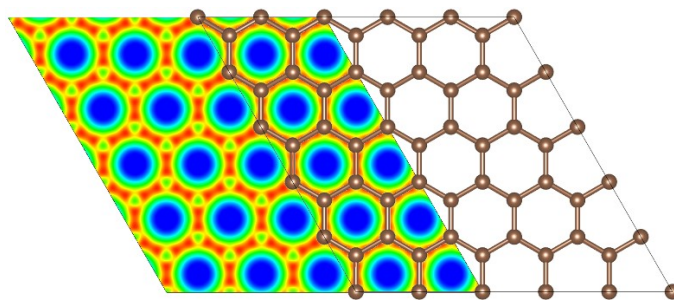

**Figure S1.** The charge density diagram of graphene.

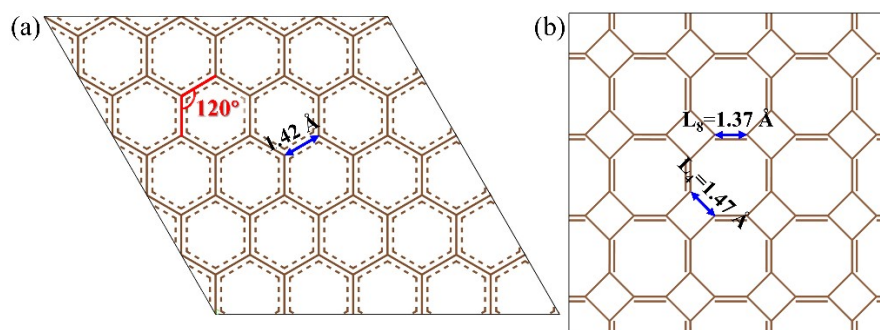

**Figure S2.** The carbon network of (a) graphene and (b) T-graphene.

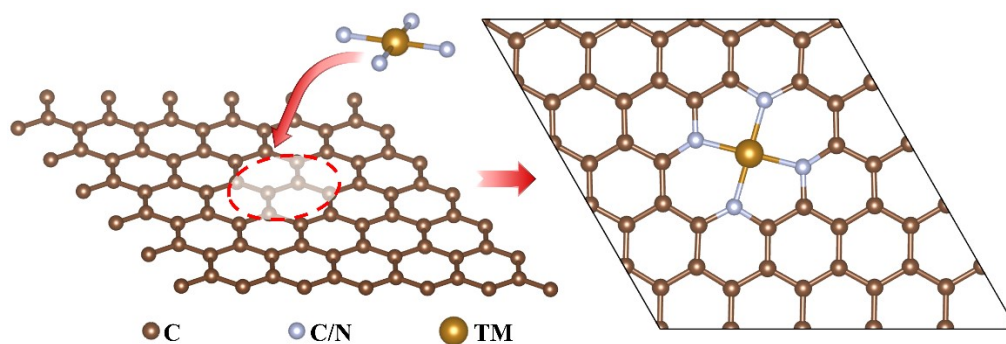

**Figure S3.** The schematic diagram of the formation process of TM-Gra. Brown and gold balls represent carbon (C) and 3d TM respectively. Gray balls represent carbon (C) in  $\text{TMC}_4\text{-Gra}$  and nitrogen (N) in  $\text{TMN}_4\text{-Gra}$  configurations. Red dashed box represents the atoms replaced on the T-graphene support.

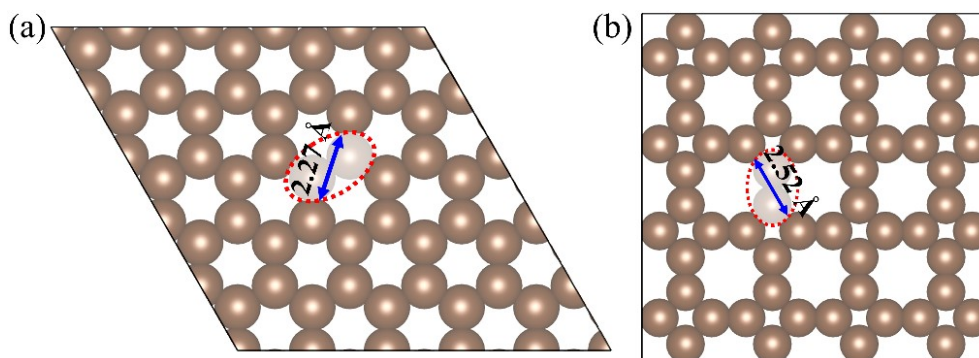

**Figure S4.** The illustration of dual-vacancy pore size in (a) graphene and (b) T-graphene.

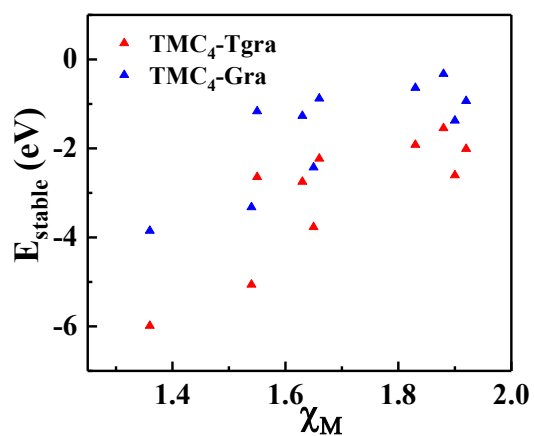

**Figure S5.** The stable energy ( $E_{\text{stable}}$ ) of TMC<sub>4</sub> located on T-graphene and graphene materials *versus* the electronegativity of metal.

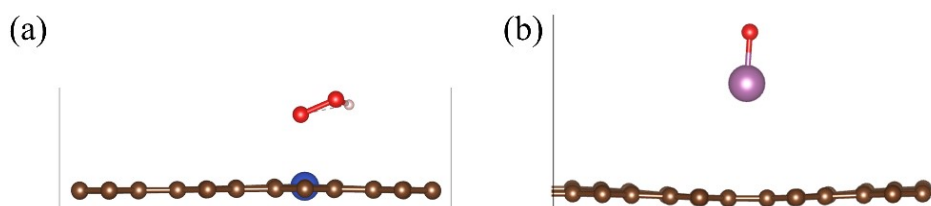

**Figure S6.** The optimized configuration of (a) CuC<sub>4</sub>-Tgra and (b) ScC<sub>4</sub>-Tgra adsorbing oxygen intermediates.

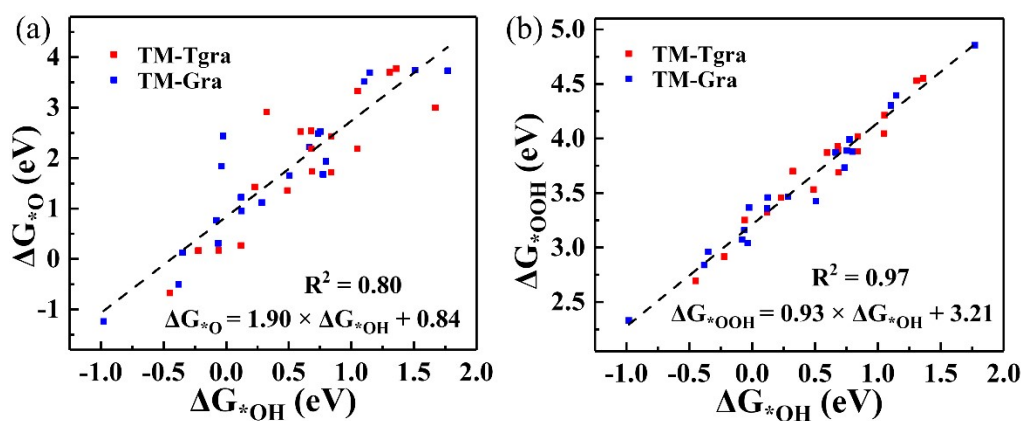

Figure S7. The relationship of (a)  $\Delta G^*_{\text{O}}$  versus  $\Delta G^*_{\text{OH}}$  and (b)  $\Delta G^*_{\text{OOH}}$  versus  $\Delta G^*_{\text{OH}}$ .

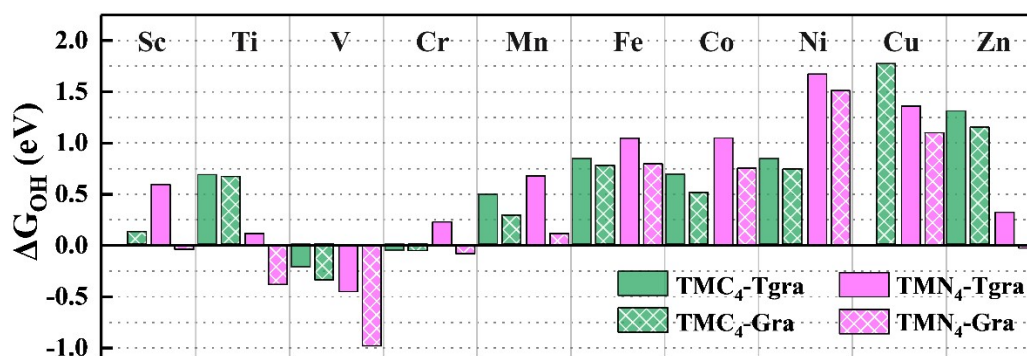

Figure S8. \*OH adsorption energy ( $\Delta G^*_{\text{OH}}$ ) of all TM-Tgra and TM-Gra.

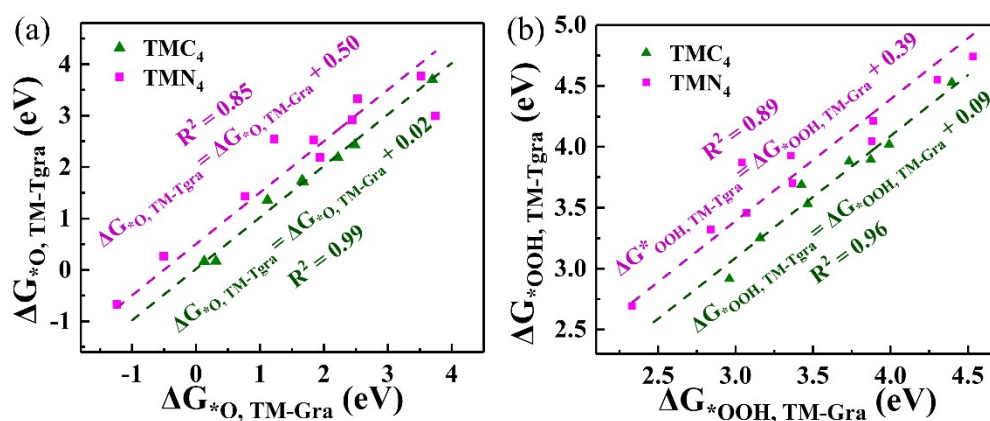

Figure S9. The relationship of (a)  $\Delta G^*_{\text{O}}$  of TM-Tgra versus  $\Delta G^*_{\text{O}}$  of TM-Gra and (b)  $\Delta G^*_{\text{OOH}}$  of TM-Tgra versus  $\Delta G^*_{\text{OOH}}$  of TM-Gra.

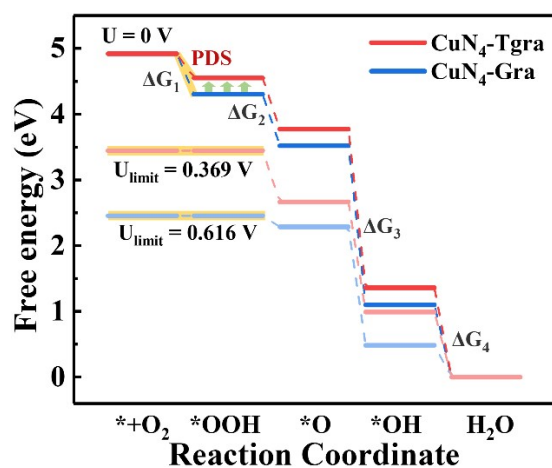

**Figure S10.** The free energy diagram of CuN<sub>4</sub> with weak binding strength with intermediates.

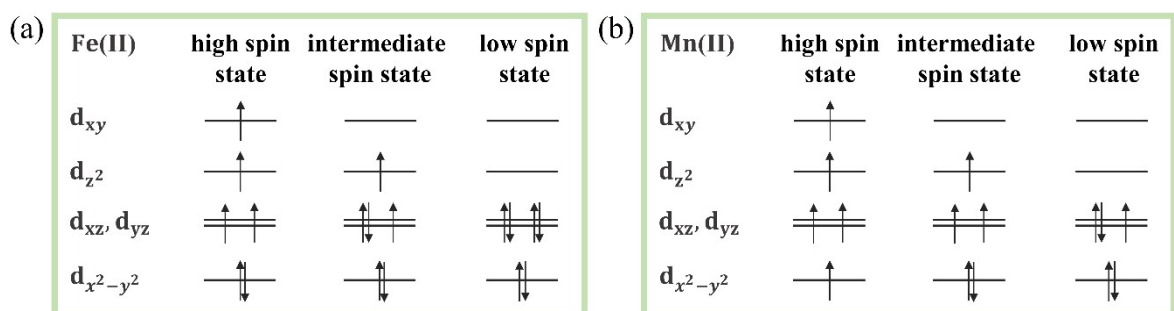

**Figure S11.** The d-orbital electronic arrangement of (a) Fe(II) and (b) Mn(II) with high, intermediate and low spin states.

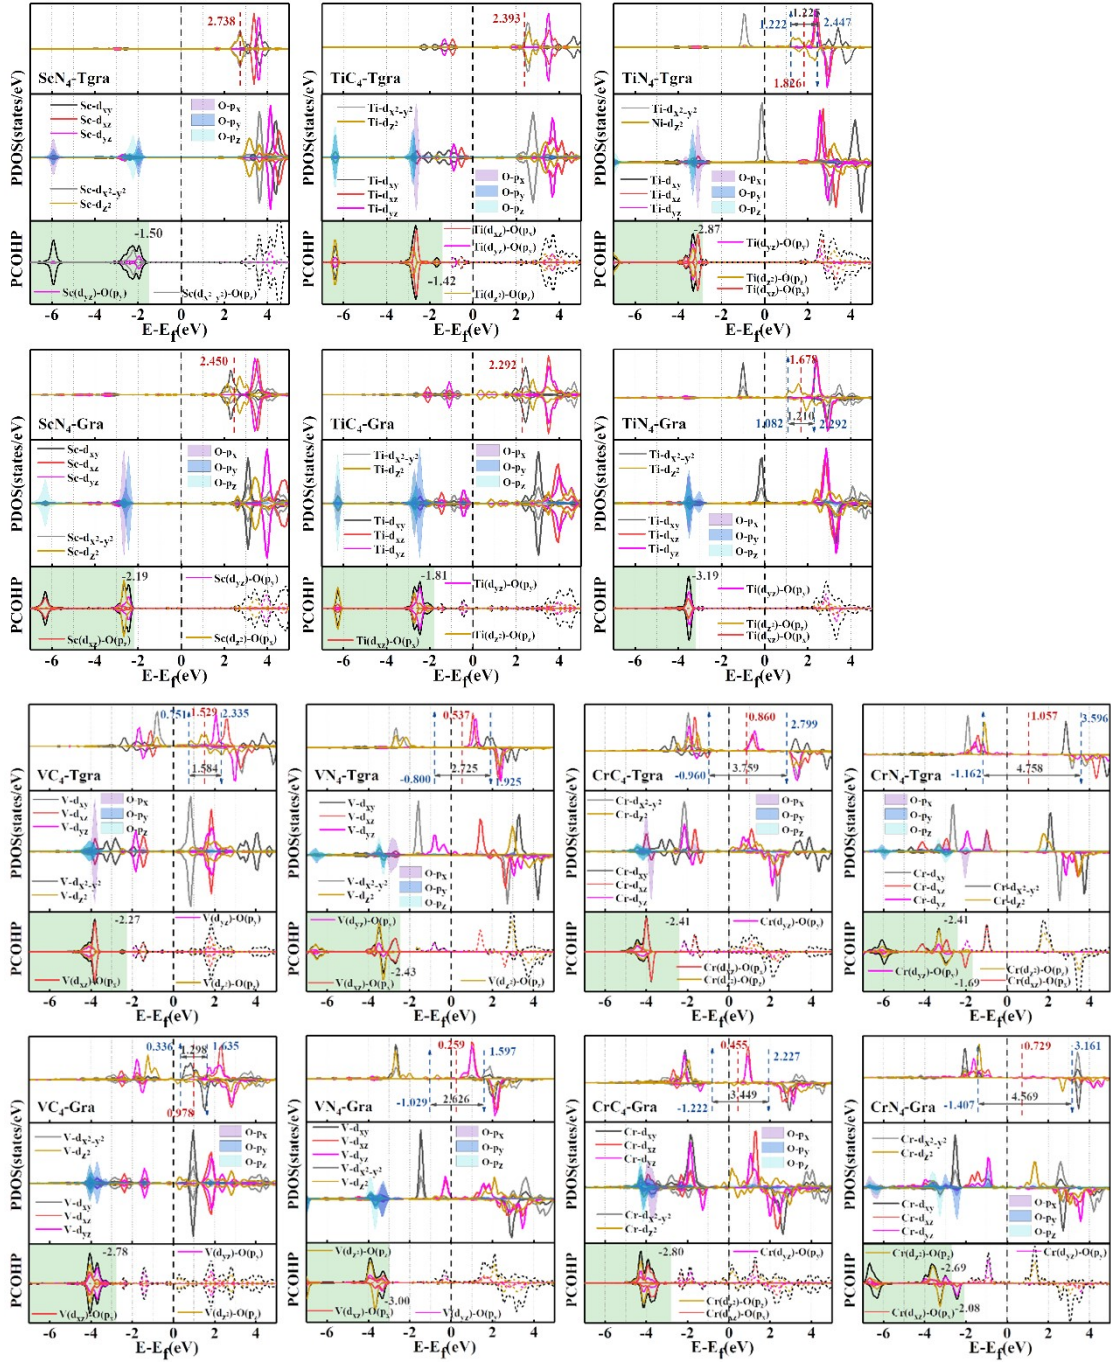



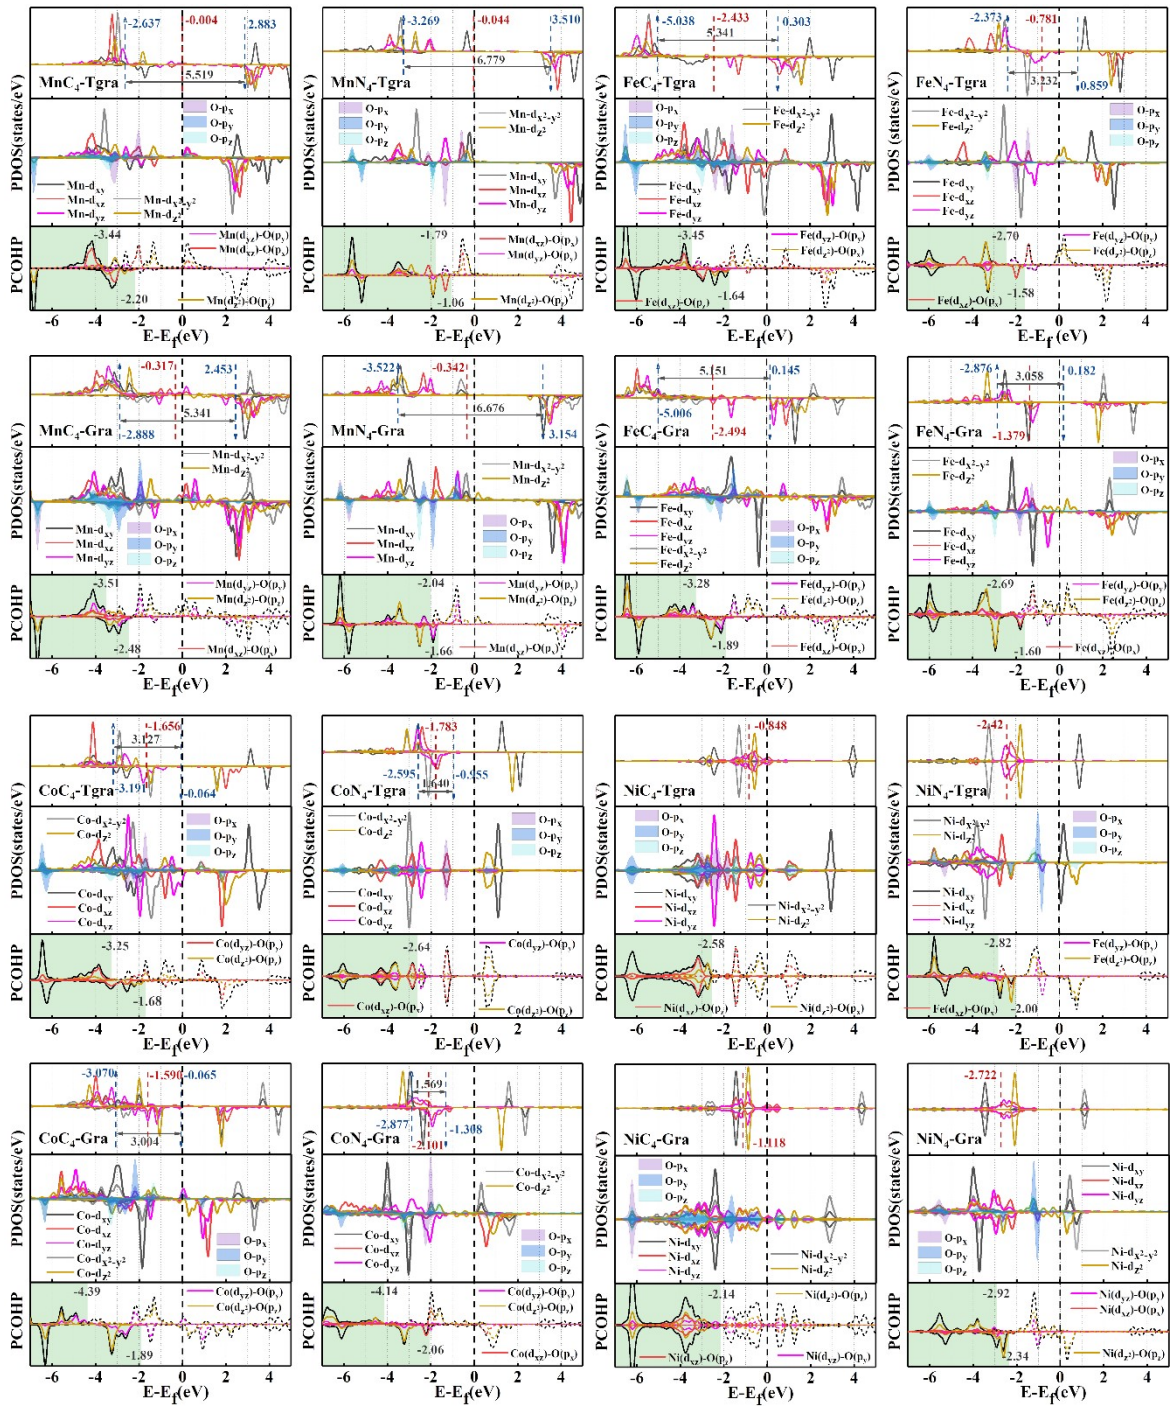

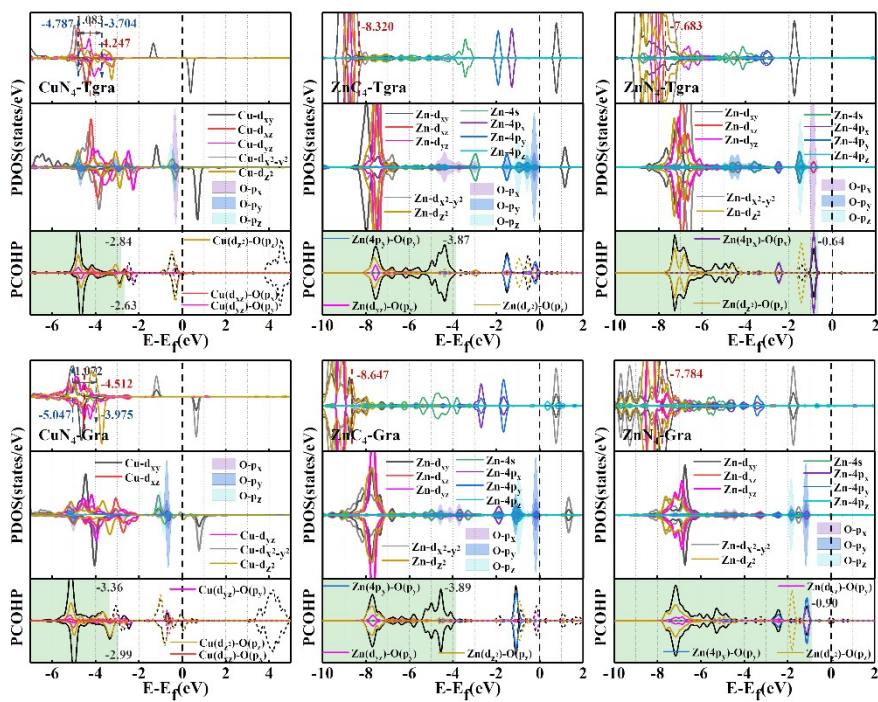

**Figure S12.** PDOS and PCOHP before and after adsorbing \*OH on TM-Tgra and TM-Gra.

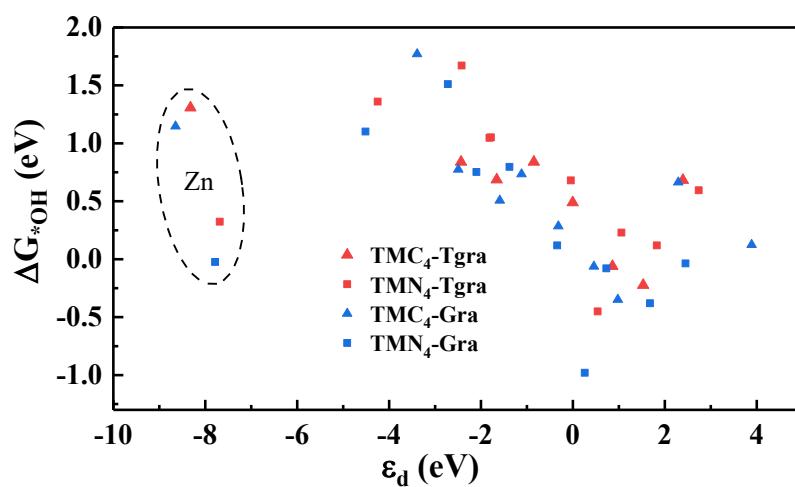

**Figure S13.** The relationship of  $\Delta G_{*OH}$  versus d-band center ( $\epsilon_d$ ).

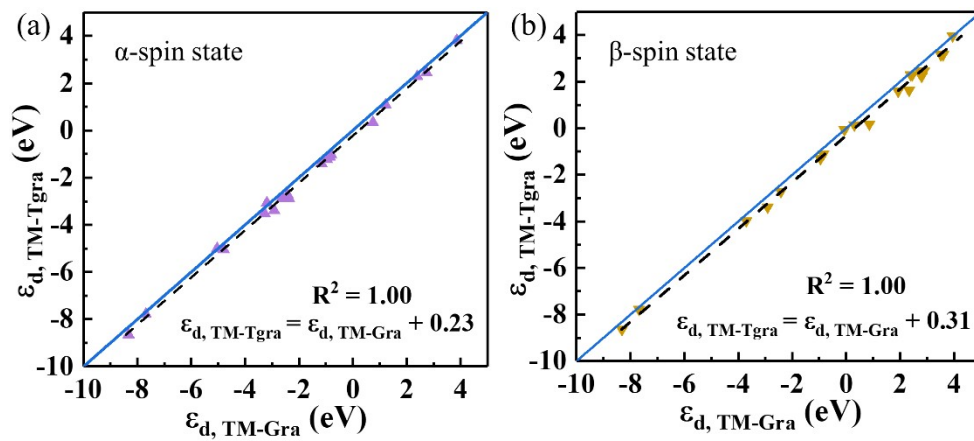

**Figure S14.** The relationship between (a)  $\alpha$ -spin state and (b)  $\beta$ -spin state d-band centers of TM-Tgra and that of TM-Gra.

### 3 Supplementary Tables

**Table S1** The values of U–J parameters for DFT/PBE+U calculations.<sup>22</sup>

| Sc   | Ti   | V    | Cr   | Mn   | Fe   | Co   | Ni   | Cu   | Zn   |
|------|------|------|------|------|------|------|------|------|------|
| 2.11 | 2.58 | 2.72 | 2.79 | 3.06 | 3.29 | 3.42 | 3.40 | 3.87 | 4.12 |

**Table S2** The values used for zero-point energy corrections (eV).

| Species | Adsorbed on clean slab |
|---------|------------------------|
| *O      | 0.070                  |
| *OH     | 0.330                  |
| *OOH    | 0.430                  |

**Table S3** Energy values for H<sub>2</sub>O, O<sub>2</sub> and H<sub>2</sub>.

|                     | Pressure (bar) | E <sub>DFT</sub> (eV) | ZPE (eV) | G (eV)  |
|---------------------|----------------|-----------------------|----------|---------|
| O <sub>2</sub> (g)  | 1              | –                     | –        | –9.900  |
| H <sub>2</sub> (g)  | 1              | –6.773                | –0.045   | –6.818  |
| H <sub>2</sub> O(l) | 0.035          | –14.228               | –0.000   | –14.228 |

**Table S4** The properties of 3d-transition metals.

| TM | $E_{\text{TM}}$ (eV) | $\chi_{\text{M}}^{23}$ | $r_{\text{M}}$ ( $\text{\AA}$ ) <sup>23</sup> |
|----|----------------------|------------------------|-----------------------------------------------|
| Sc | -6.647               | 1.36                   | 1.59                                          |
| Ti | -8.458               | 1.54                   | 1.48                                          |
| V  | -9.688               | 1.63                   | 1.44                                          |
| Cr | -10.017              | 1.66                   | 1.30                                          |
| Mn | -9.374               | 1.55                   | 1.29                                          |
| Fe | -8.600               | 1.83                   | 1.24                                          |
| Co | -7.461               | 1.88                   | 1.18                                          |
| Ni | -5.939               | 1.91                   | 1.17                                          |
| Cu | -4.319               | 1.90                   | 1.22                                          |
| Zn | -1.520               | 1.65                   | 1.20                                          |

**Table S5** The stability energy (eV) of all TM-Tgra and TM-Gra configurations.

| TM | TMC <sub>4</sub> -Tgra | TMN <sub>4</sub> -Tgra | TMC <sub>4</sub> -Gra | TMN <sub>4</sub> -Gra |
|----|------------------------|------------------------|-----------------------|-----------------------|
| Sc | -5.986                 | -6.104                 | -3.851                | -5.030                |
| Ti | -5.062                 | -3.306                 | -3.322                | -2.594                |
| V  | -2.750                 | -1.174                 | -1.270                | -0.355                |
| Cr | -2.231                 | -1.198                 | -0.881                | -0.752                |
| Mn | -2.643                 | -1.175                 | -1.165                | -0.595                |
| Fe | -1.921                 | -0.078                 | -0.639                | -0.137                |
| Co | -1.547                 | 0.209                  | -0.326                | -0.037                |
| Ni | -2.012                 | -0.246                 | -0.934                | -0.610                |
| Cu | -2.604                 | -0.013                 | -1.377                | 0.012                 |
| Zn | -3.771                 | -2.233                 | -2.430                | -1.897                |

**Table S6** Adsorption free energies of \*OH, \*O and \*OOH (eV) and ORR onset potential ( $U_{\text{onset}}$ ) (V) on TM-Tgra and TM-Gra. And reaction barriers ( $\Delta G_1 \sim \Delta G_4$ ) (eV) of ORR elementary reactions at 1.23 V on TM-Tgra and TM-Gra.

|                             | *OH    | *O     | *OOH  | $U_{\text{onset}}$ | $\Delta G_1$ | $\Delta G_2$ | $\Delta G_3$ | $\Delta G_4$ |
|-----------------------------|--------|--------|-------|--------------------|--------------|--------------|--------------|--------------|
| <b>ScC<sub>4</sub>-Tgra</b> | –      | –      | –     | –                  | –            | –            | –            | –            |
| <b>TiC<sub>4</sub>-Tgra</b> | 0.682  | 2.186  | 3.896 | 0.682              | 0.206        | –0.48        | –0.274       | 0.548        |
| <b>VC<sub>4</sub>-Tgra</b>  | –0.223 | 0.166  | 2.916 | –0.223             | –0.774       | –1.52        | 0.841        | 1.453        |
| <b>CrC<sub>4</sub>-Tgra</b> | –0.060 | 0.170  | 3.253 | –0.060             | –0.437       | –1.853       | 1.000        | 1.290        |
| <b>MnC<sub>4</sub>-Tgra</b> | 0.489  | 1.357  | 3.532 | 0.489              | –0.158       | –0.945       | 0.362        | 0.741        |
| <b>FeC<sub>4</sub>-Tgra</b> | 0.839  | 1.716  | 4.020 | 0.839              | 0.330        | –1.074       | 0.353        | 0.391        |
| <b>CoC<sub>4</sub>-Tgra</b> | 0.686  | 1.737  | 3.689 | 0.686              | –0.001       | –0.722       | 0.179        | 0.544        |
| <b>NiC<sub>4</sub>-Tgra</b> | 0.840  | 2.432  | 3.881 | 0.840              | 0.191        | –0.219       | –0.362       | 0.390        |
| <b>CuC<sub>4</sub>-Tgra</b> | –      | –      | –     | –                  | –            | –            | –            | –            |
| <b>ZnC<sub>4</sub>-Tgra</b> | 1.308  | 3.698  | 4.529 | 0.391              | 0.839        | 0.399        | –1.160       | –0.078       |
| <b>ScN<sub>4</sub>-Tgra</b> | 0.595  | 2.523  | 3.872 | 0.595              | 0.182        | –0.119       | –0.698       | 0.635        |
| <b>TiN<sub>4</sub>-Tgra</b> | 0.119  | 0.269  | 3.322 | 0.119              | –0.368       | –1.823       | 1.080        | 1.111        |
| <b>VN<sub>4</sub>-Tgra</b>  | –0.450 | –0.675 | 2.694 | –0.450             | –0.996       | –2.139       | 1.455        | 1.680        |
| <b>CrN<sub>4</sub>-Tgra</b> | 0.229  | 1.431  | 3.458 | 0.229              | –0.232       | –0.797       | 0.028        | 1.001        |
| <b>MnN<sub>4</sub>-Tgra</b> | 0.679  | 2.539  | 3.928 | 0.679              | 0.238        | –0.159       | –0.630       | 0.551        |
| <b>FeN<sub>4</sub>-Tgra</b> | 1.048  | 2.186  | 4.046 | 0.874              | 0.356        | –0.630       | 0.092        | 0.182        |
| <b>CoN<sub>4</sub>-Tgra</b> | 1.051  | 3.331  | 4.214 | 0.706              | 0.524        | 0.347        | –1.050       | 0.179        |
| <b>NiN<sub>4</sub>-Tgra</b> | 1.672  | 2.995  | 4.740 | 0.180              | 1.050        | –0.515       | –0.093       | –0.442       |
| <b>CuN<sub>4</sub>-Tgra</b> | 1.360  | 3.773  | 4.551 | 0.369              | 0.861        | 0.452        | –1.183       | –0.130       |
| <b>ZnN<sub>4</sub>-Tgra</b> | 0.323  | 2.915  | 3.701 | 0.323              | 0.011        | 0.444        | –1.362       | 0.907        |
| <b>ScC<sub>4</sub>-Gra</b>  | 0.124  | 0.951  | 3.460 | 0.124              | –0.230       | –1.279       | 0.403        | 1.106        |
| <b>TiC<sub>4</sub>-Gra</b>  | 0.664  | 2.219  | 3.872 | 0.664              | 0.182        | –0.423       | –0.325       | 0.566        |
| <b>VC<sub>4</sub>-Gra</b>   | –0.349 | 0.129  | 2.960 | –0.349             | –0.730       | –1.601       | 0.752        | 1.579        |
| <b>CrC<sub>4</sub>-Gra</b>  | –0.063 | 0.310  | 3.158 | –0.063             | –0.532       | –1.618       | 0.857        | 1.293        |
| <b>MnC<sub>4</sub>-Gra</b>  | 0.284  | 1.118  | 3.465 | 0.284              | –0.225       | –1.117       | 0.396        | 0.946        |
| <b>FeC<sub>4</sub>-Gra</b>  | 0.774  | 1.677  | 3.991 | 0.774              | 0.301        | –1.084       | 0.327        | 0.456        |
| <b>CoC<sub>4</sub>-Gra</b>  | 0.507  | 1.657  | 3.425 | 0.507              | –0.265       | –0.538       | 0.08         | 0.723        |

|                            |        |        |       |        |        |        |        |        |
|----------------------------|--------|--------|-------|--------|--------|--------|--------|--------|
| <b>NiC<sub>4</sub>-Gra</b> | 0.734  | 2.484  | 3.732 | 0.734  | 0.042  | -0.018 | -0.520 | 0.496  |
| <b>CuC<sub>4</sub>-Gra</b> | 1.770  | 3.730  | 4.855 | 0.065  | 1.165  | 0.105  | -0.730 | -0.540 |
| <b>ZnC<sub>4</sub>-Gra</b> | 1.146  | 3.697  | 4.396 | 0.524  | 0.706  | 0.531  | -1.321 | 0.084  |
| <b>ScN<sub>4</sub>-Gra</b> | -0.037 | 1.841  | 3.041 | -0.037 | -0.649 | 0.030  | -0.648 | 1.267  |
| <b>TiN<sub>4</sub>-Gra</b> | -0.381 | -0.506 | 2.839 | -0.381 | -0.851 | -2.115 | 1.355  | 1.611  |
| <b>VN<sub>4</sub>-Gra</b>  | -0.980 | -1.236 | 2.331 | -0.980 | -1.359 | -2.337 | 1.486  | 2.210  |
| <b>CrN<sub>4</sub>-Gra</b> | -0.079 | 0.768  | 3.072 | -0.079 | -0.618 | -1.074 | 0.383  | 1.309  |
| <b>MnN<sub>4</sub>-Gra</b> | 0.119  | 1.224  | 3.358 | 0.119  | -0.332 | -0.904 | 0.125  | 1.111  |
| <b>FeN<sub>4</sub>-Gra</b> | 0.797  | 1.933  | 3.880 | 0.797  | 0.190  | -0.717 | 0.094  | 0.433  |
| <b>CoN<sub>4</sub>-Gra</b> | 0.753  | 2.524  | 3.888 | 0.753  | 0.198  | -0.134 | -0.541 | 0.477  |
| <b>NiN<sub>4</sub>-Gra</b> | 1.511  | 3.743  | 4.533 | 0.387  | 0.843  | 0.440  | -1.002 | -0.281 |
| <b>CuN<sub>4</sub>-Gra</b> | 1.102  | 3.519  | 4.304 | 0.616  | 0.614  | 0.445  | -1.187 | 0.128  |
| <b>ZnN<sub>4</sub>-Gra</b> | -0.024 | 2.439  | 3.367 | -0.024 | -0.323 | 0.302  | -1.233 | 1.254  |

**Table S7** The  $\alpha$ -spin ( $\epsilon_{d, \alpha}$ ),  $\beta$ -spin state ( $\epsilon_{d, \beta}$ ), and total electronic state ( $\epsilon_d$ ) d-band center of TM-Tgra and TM-Gra.

|                             | $\epsilon_{d, \alpha}$ (eV) | $\epsilon_{d, \beta}$ (eV) | $\epsilon_d$ (eV) |
|-----------------------------|-----------------------------|----------------------------|-------------------|
| <b>ScC<sub>4</sub>-Tgra</b> | 3.861                       | 3.948                      | 3.905             |
| <b>TiC<sub>4</sub>-Tgra</b> | 2.393                       | 2.393                      | 2.393             |
| <b>VC<sub>4</sub>-Tgra</b>  | 0.751                       | 2.335                      | 1.529             |
| <b>CrC<sub>4</sub>-Tgra</b> | -0.960                      | 2.799                      | 0.860             |
| <b>MnC<sub>4</sub>-Tgra</b> | -2.637                      | 2.883                      | -0.004            |
| <b>FeC<sub>4</sub>-Tgra</b> | -5.038                      | 0.303                      | -2.433            |
| <b>CoC<sub>4</sub>-Tgra</b> | -3.191                      | -0.064                     | -1.656            |
| <b>NiC<sub>4</sub>-Tgra</b> | -0.849                      | -0.848                     | -0.848            |
| <b>CuC<sub>4</sub>-Tgra</b> | -2.914                      | -2.913                     | -2.913            |
| <b>ZnC<sub>4</sub>-Tgra</b> | -8.322                      | -8.319                     | -8.320            |
| <b>ScN<sub>4</sub>-Tgra</b> | 2.737                       | 2.739                      | 2.738             |
| <b>TiN<sub>4</sub>-Tgra</b> | 1.222                       | 2.447                      | 1.826             |
| <b>VN<sub>4</sub>-Tgra</b>  | -0.800                      | 1.925                      | 0.537             |
| <b>CrN<sub>4</sub>-Tgra</b> | -1.162                      | 3.596                      | 1.057             |
| <b>MnN<sub>4</sub>-Tgra</b> | -3.269                      | 3.510                      | -0.044            |
| <b>FeN<sub>4</sub>-Tgra</b> | -2.373                      | 0.859                      | -0.781            |
| <b>CoN<sub>4</sub>-Tgra</b> | -2.595                      | -0.955                     | -1.783            |
| <b>NiN<sub>4</sub>-Tgra</b> | -2.422                      | -2.421                     | -2.421            |
| <b>CuN<sub>4</sub>-Tgra</b> | -4.787                      | -3.704                     | -4.247            |
| <b>ZnN<sub>4</sub>-Tgra</b> | -7.684                      | -7.682                     | -7.683            |
| <b>ScC<sub>4</sub>-Gra</b>  | 3.815                       | 3.965                      | 3.889             |
| <b>TiC<sub>4</sub>-Gra</b>  | 2.288                       | 2.295                      | 2.292             |
| <b>VC<sub>4</sub>-Gra</b>   | 0.336                       | 1.635                      | 0.978             |
| <b>CrC<sub>4</sub>-Gra</b>  | -1.222                      | 2.227                      | 0.455             |
| <b>MnC<sub>4</sub>-Gra</b>  | -2.888                      | 2.453                      | -0.317            |
| <b>FeC<sub>4</sub>-Gra</b>  | -5.006                      | 0.145                      | -2.494            |
| <b>CoC<sub>4</sub>-Gra</b>  | -3.070                      | -0.065                     | -1.590            |
| <b>NiC<sub>4</sub>-Gra</b>  | -1.118                      | -1.117                     | -1.118            |
| <b>CuC<sub>4</sub>-Gra</b>  | -3.390                      | -3.387                     | -3.389            |
| <b>ZnC<sub>4</sub>-Gra</b>  | -8.649                      | -8.644                     | -8.647            |



---

|                            |        |        |        |
|----------------------------|--------|--------|--------|
| <b>ScN<sub>4</sub>-Gra</b> | 2.449  | 2.450  | 2.450  |
| <b>TiN<sub>4</sub>-Gra</b> | 1.082  | 2.292  | 1.678  |
| <b>VN<sub>4</sub>-Gra</b>  | -1.029 | 1.597  | 0.259  |
| <b>CrN<sub>4</sub>-Gra</b> | -1.407 | 3.161  | 0.729  |
| <b>MnN<sub>4</sub>-Gra</b> | -3.522 | 3.154  | -0.342 |
| <b>FeN<sub>4</sub>-Gra</b> | -2.876 | 0.182  | -1.379 |
| <b>CoN<sub>4</sub>-Gra</b> | -2.877 | -1.308 | -2.101 |
| <b>NiN<sub>4</sub>-Gra</b> | -2.723 | -2.722 | -2.722 |
| <b>CuN<sub>4</sub>-Gra</b> | -5.047 | -3.975 | -4.512 |
| <b>ZnN<sub>4</sub>-Gra</b> | -7.785 | -7.783 | -7.784 |

---

## Reference

1. Kresse, G.; Furthmüller, J., Efficiency of ab-initio total energy calculations for metals and semiconductors using a plane-wave basis set. *Computational Materials Science* **1996**, *6*, 15-50.
2. Kresse, G.; Furthmüller, J., Efficient iterative schemes for ab initio total-energy calculations using a plane-wave basis set. *PHYSICAL REVIEW B* **1996**, *54* (16), 11169-11185.
3. Perdew, J. P.; Burke, K.; Ernzerhof, M., Generalized Gradient Approximation Made Simple. **1996**, *77* (18), 3865-3868.
4. Xia, D.; Yang, X.; Xie, L.; Wei, Y.; Jiang, W.; Dou, M.; Li, X.; Li, J.; Gan, L.; Kang, F., Direct Growth of Carbon Nanotubes Doped with Single Atomic Fe–N<sub>4</sub> Active Sites and Neighboring Graphitic Nitrogen for Efficient and Stable Oxygen Reduction Electrocatalysis. *Advanced Functional Materials* **2019**, *29* (49), 1906174.
5. Chen, Y.; Gao, R.; Ji, S.; Li, H.; Tang, K.; Jiang, P.; Hu, H.; Zhang, Z.; Hao, H.; Qu, Q.; Liang, X.; Chen, W.; Dong, J.; Wang, D.; Li, Y., Atomic-Level Modulation of Electronic Density at Cobalt Single-Atom Sites Derived from Metal-Organic Frameworks: Enhanced Oxygen Reduction Performance. *Angew Chem Int Ed Engl* **2021**, *60* (6), 3212-3221.
6. Hu, X.; Chen, S.; Chen, L.; Tian, Y.; Yao, S.; Lu, Z.; Zhang, X.; Zhou, Z., What is the Real Origin of the Activity of Fe-N-C Electrocatalysts in the O(2) Reduction Reaction? Critical Roles of Coordinating Pyrrolic N and Axially Adsorbing Species. *J Am Chem Soc* **2022**, *144* (39), 18144-18152.
7. Kresse, G.; Joubert, D., From ultrasoft pseudopotentials to the projector augmented-wave method. *PHYSICAL REVIEW B* **1999**, *59* (3), 1758-1775.
8. Dudarev, S. L.; Botton, G. A.; Savrasov, S. Y.; Humphreys, C. J.; Sutton, A. P., Electron-energy-loss spectra and the structural stability of nickel oxide: An LSDA+U study. *PHYSICAL REVIEW B* **1998**, *57* (3), 1505-1509.
9. Duan, Z.; Henkelman, G., Surface Charge and Electrostatic Spin Crossover Effects in CoN<sub>4</sub> Electrocatalysts. *ACS Catalysis* **2020**, *10* (20), 12148-12155.
10. Yin, S. H.; Yang, J.; Han, Y.; Li, G.; Wan, L. Y.; Chen, Y. H.; Chen, C.; Qu, X. M.; Jiang, Y. X.; Sun, S. G., Construction of Highly Active Metal-Containing Nanoparticles and FeCo-N(4) Composite Sites for the Acidic Oxygen Reduction Reaction. *Angew Chem Int Ed Engl* **2020**, *59* (49), 21976-21979.
11. Yao, X.; Zhu, Y.; Xia, T.; Han, Z.; Du, C.; Yang, L.; Tian, J.; Ma, X.; Hou, J.; Cao, C., Tuning Carbon Defect in Copper Single-Atom Catalysts for Efficient Oxygen Reduction. *Small* **2023**, *19* (28), e2301075.
12. Cheng, X.; Yang, J.; Yan, W.; Han, Y.; Qu, X.; Yin, S.; Chen, C.; Ji, R.;

- Li, Y.; Li, G.; Li, G.; Jiang, Y.; Sun, S., Nano-geometric deformation and synergistic Co nanoparticles—Co-N<sub>4</sub> composite sites for proton exchange membrane fuel cells. *Energy & Environmental Science* **2021**, *14* (11), 5958-5967.
13. Grimme, S.; Ehrlich, S.; Goerigk, L., Effect of the damping function in dispersion corrected density functional theory. *J Comput Chem* **2011**, *32* (7), 1456-65.
14. Grimme, S.; Antony, J.; Ehrlich, S.; Krieg, H., A consistent and accurate ab initio parametrization of density functional dispersion correction (DFT-D) for the 94 elements H-Pu. *J Chem Phys* **2010**, *132* (15), 154104.
15. Mathew, K.; Sundararaman, R.; Letchworth-Weaver, K.; Arias, T. A.; Hennig, R. G., Implicit solvation model for density-functional study of nanocrystal surfaces and reaction pathways. *J Chem Phys* **2014**, *140* (8), 084106.
16. Maintz, S.; Deringer, V. L.; Tchougreeff, A. L.; Dronskowski, R., LOBSTER: A tool to extract chemical bonding from plane-wave based DFT. *J Comput Chem* **2016**, *37* (11), 1030-5.
17. Deringer, V. L.; Tchougreeff, A. L.; Dronskowski, R., Crystal orbital Hamilton population (COHP) analysis as projected from plane-wave basis sets. *J Phys Chem A* **2011**, *115* (21), 5461-6.
18. Wang, V.; Xu, N.; Liu, J.-C.; Tang, G.; Geng, W.-T., VASPKIT: A user-friendly interface facilitating high-throughput computing and analysis using VASP code. *Computer Physics Communications* **2021**, *267*, 108033.
19. Nørskov, J. K.; Rossmeisl, J.; Logadottir, A.; Lindqvist, L.; Kitchin, J. R.; Bligaard, T.; Jo'ansson, H., Origin of the Overpotential for Oxygen Reduction at a Fuel-Cell Cathode. *J. Phys. Chem. B* **2004**, *108*, 17886-17892.
20. Nørskov, J. K.; Bligaard, T.; Logadottir, A.; Bahn, S.; Hansen, L. B.; Bollinger, M.; Bengaard, H.; Hammer, B.; Sljivancanin, Z.; Mavrikakis, M.; Xu, Y.; Dahl, S.; Jacobsen, C. J. H., Universality in Heterogeneous Catalysis. *Journal of Catalysis* **2002**, *209* (2), 275-278.
21. Sun, Y.; Sun, S.; Yang, H.; Xi, S.; Gracia, J.; Xu, Z. J., Spin-Related Electron Transfer and Orbital Interactions in Oxygen Electrocatalysis. *Adv Mater* **2020**, *32* (39), e2003297.
22. Xu, H.; Cheng, D.; Cao, D.; Zeng, X. C., A universal principle for a rational design of single-atom electrocatalysts. *Nature Catalysis* **2018**, *1* (5), 339-348.
23. Haynes, W. M.; Lide, D. R.; Bruno, T. J., CRC Handbook of Chemistry and Physics. **2016**.
